# Supplementary material for: In vivo antiviral efficacy and immune dampening effect of zapnometinib emphasize a dual therapeutic potential against COVID-19
Source: Research Square preprint supplement (doi:10.21203/rs.3.rs-1381607/v1), 2022-02-28
Supplement: Supplementary file 1 [file a602652fa3f934d95b610088.xlsx]

## Sheet: Gene Table
PCR Array Catalog #:	PAMM-150Z
Position	Refseq	Symbol	Description	RT2 Catalog
A01	NM_009605	Adipoq	Adiponectin, C1Q and collagen domain containing	PPM05260A
A02	NM_007553	Bmp2	Bone morphogenetic protein 2	PPM03753A
A03	NM_007554	Bmp4	Bone morphogenetic protein 4	PPM02998F
A04	NM_007556	Bmp6	Bone morphogenetic protein 6	PPM04429F
A05	NM_007557	Bmp7	Bone morphogenetic protein 7	PPM03001C
A06	NM_011329	Ccl1	Chemokine (C-C motif) ligand 1	PPM03138C
A07	NM_011330	Ccl11	Chemokine (C-C motif) ligand 11	PPM02967G
A08	NM_011331	Ccl12	Chemokine (C-C motif) ligand 12	PPM02977E
A09	NM_011332	Ccl17	Chemokine (C-C motif) ligand 17	PPM02963B
A10	NM_011888	Ccl19	Chemokine (C-C motif) ligand 19	PPM03157C
A11	NM_011333	Ccl2	Chemokine (C-C motif) ligand 2	PPM03151G
A12	NM_016960	Ccl20	Chemokine (C-C motif) ligand 20	PPM03142B
B01	NM_009137	Ccl22	Chemokine (C-C motif) ligand 22	PPM02950B
B02	NM_019577	Ccl24	Chemokine (C-C motif) ligand 24	PPM03159F
B03	NM_011337	Ccl3	Chemokine (C-C motif) ligand 3	PPM02949F
B04	NM_013652	Ccl4	Chemokine (C-C motif) ligand 4	PPM02948F
B05	NM_013653	Ccl5	Chemokine (C-C motif) ligand 5	PPM02960F
B06	NM_013654	Ccl7	Chemokine (C-C motif) ligand 7	PPM02955B
B07	NM_011616	Cd40lg	CD40 ligand	PPM03226C
B08	NM_011617	Cd70	CD70 antigen	PPM03552E
B09	NM_170786	Cntf	Ciliary neurotrophic factor	PPM68695B
B10	NM_007778	Csf1	Colony stimulating factor 1 (macrophage)	PPM03116C
B11	NM_009969	Csf2	Colony stimulating factor 2 (granulocyte-macrophage)	PPM02990F
B12	NM_009971	Csf3	Colony stimulating factor 3 (granulocyte)	PPM02989B
C01	NM_007795	Ctf1	Cardiotrophin 1	PPM05017D
C02	NM_009142	Cx3cl1	Chemokine (C-X3-C motif) ligand 1	PPM02959F
C03	NM_008176	Cxcl1	Chemokine (C-X-C motif) ligand 1	PPM03058C
C04	NM_021274	Cxcl10	Chemokine (C-X-C motif) ligand 10	PPM02978E
C05	NM_019494	Cxcl11	Chemokine (C-X-C motif) ligand 11	PPM03192C
C06	NM_021704	Cxcl12	Chemokine (C-X-C motif) ligand 12	PPM02965E
C07	NM_018866	Cxcl13	Chemokine (C-X-C motif) ligand 13	PPM02947G
C08	NM_023158	Cxcl16	Chemokine (C-X-C motif) ligand 16	PPM03775A
C09	NM_203320	Cxcl3	Chemokine (C-X-C motif) ligand 3	PPM34590C
C10	NM_009141	Cxcl5	Chemokine (C-X-C motif) ligand 5	PPM02966F
C11	NM_008599	Cxcl9	Chemokine (C-X-C motif) ligand 9	PPM02973B
C12	NM_010177	Fasl	Fas ligand (TNF superfamily, member 6)	PPM02926E
D01	NM_008155	Gpi1	Glucose phosphate isomerase 1	PPM03345C
D02	NM_010406	Hc	Hemolytic complement	PPM24764C
D03	NM_010503	Ifna2	Interferon alpha 2	PPM03543A
D04	NM_008337	Ifng	Interferon gamma	PPM03121A
D05	NM_010548	Il10	Interleukin 10	PPM03017C
D06	NM_008350	Il11	Interleukin 11	PPM03018E
D07	NM_008351	Il12a	Interleukin 12A	PPM03019A
D08	NM_001303244	Il12b	Interleukin 12b	PPM03020E
D09	NM_008355	Il13	Interleukin 13	PPM03021B
D10	NM_008357	Il15	Interleukin 15	PPM03022C
D11	NM_010551	Il16	Interleukin 16	PPM03111E
D12	NM_010552	Il17a	Interleukin 17A	PPM03023A
E01	NM_145856	Il17f	Interleukin 17F	PPM05398E
E02	NM_008360	Il18	Interleukin 18	PPM03112B
E03	NM_010554	Il1a	Interleukin 1 alpha	PPM03010F
E04	NM_008361	Il1b	Interleukin 1 beta	PPM03109F
E05	NM_031167	Il1rn	Interleukin 1 receptor antagonist	PPM03547B
E06	NM_008366	Il2	Interleukin 2	PPM02937C
E07	NM_021782	Il21	Interleukin 21	PPM03761F
E08	NM_016971	Il22	Interleukin 22	PPM05481A
E09	NM_031252	Il23a	Interleukin 23, alpha subunit p19	PPM03763F
E10	NM_053095	Il24	Interleukin 24	PPM04205C
E11	NM_145636	Il27	Interleukin 27	PPM33809A
E12	NM_010556	Il3	Interleukin 3	PPM03012F
F01	NM_021283	Il4	Interleukin 4	PPM03013F
F02	NM_010558	Il5	Interleukin 5	PPM03014F
F03	NM_001314054	Il6	Interleukin 6	PPM03015A
F04	NM_008371	Il7	Interleukin 7	PPM03016C
F05	NM_008373	Il9	Interleukin 9	PPM03110A
F06	NM_008501	Lif	Leukemia inhibitory factor	PPM02988F
F07	NM_010735	Lta	Lymphotoxin A	PPM03114A
F08	NM_008518	Ltb	Lymphotoxin B	PPM03119A
F09	NM_010798	Mif	Macrophage migration inhibitory factor	PPM02985H
F10	NM_010834	Mstn	Myostatin	PPM04441F
F11	NM_013611	Nodal	Nodal	PPM04458A
F12	NM_001013365	Osm	Oncostatin M	PPM05385B
G01	NM_019932	Pf4	Platelet factor 4	PPM02986C
G02	NM_023785	Ppbp	Pro-platelet basic protein	PPM03773A
G03	NM_009263	Spp1	Secreted phosphoprotein 1	PPM03648C
G04	NM_009367	Tgfb2	Transforming growth factor, beta 2	PPM02992A
G05	NM_009379	Thpo	Thrombopoietin	PPM02984B
G06	NM_013693	Tnf	Tumor necrosis factor	PPM03113G
G07	NM_008764	Tnfrsf11b	Tumor necrosis factor receptor superfamily, member 11b (osteoprotegerin)	PPM03404F
G08	NM_009425	Tnfsf10	Tumor necrosis factor (ligand) superfamily, member 10	PPM02925B
G09	NM_011613	Tnfsf11	Tumor necrosis factor (ligand) superfamily, member 11	PPM03047F
G10	NM_033622	Tnfsf13b	Tumor necrosis factor (ligand) superfamily, member 13b	PPM03751B
G11	NM_009505	Vegfa	Vascular endothelial growth factor A	PPM03041F
G12	NM_008510	Xcl1	Chemokine (C motif) ligand 1	PPM02956C
H01	NM_007393	Actb	Actin, beta	PPM02945B
H02	NM_009735	B2m	Beta-2 microglobulin	PPM03562A
H03	NM_008084	Gapdh	Glyceraldehyde-3-phosphate dehydrogenase	PPM02946E
H04	NM_010368	Gusb	Glucuronidase, beta	PPM05490C
H05	NM_008302	Hsp90ab1	Heat shock protein 90 alpha (cytosolic), class B member 1	PPM04803F
H06	SA_00106	MGDC	Mouse Genomic DNA Contamination
H07	SA_00104	RTC	Reverse Transcription Control	PPX63340A
H08	SA_00104	RTC	Reverse Transcription Control	PPX63340A
H09	SA_00104	RTC	Reverse Transcription Control	PPX63340A
H10	SA_00103	PPC	Positive PCR Control
H11	SA_00103	PPC	Positive PCR Control
H12	SA_00103	PPC	Positive PCR Control
